# Supplementary material for: Synthesis of biocompatible Au–ZnTe core–shell nanoparticles
Source: Royal Society of Chemistry journal article supplement (doi:10.1039/c4tb01779j), 2015-01-01
Supplement: c4tb01779j1.pdf [file c4tb01779j1.pdf]

Supplementary data: Synthesis of biocompatible Au-ZnTe core/shell nanoparticles.

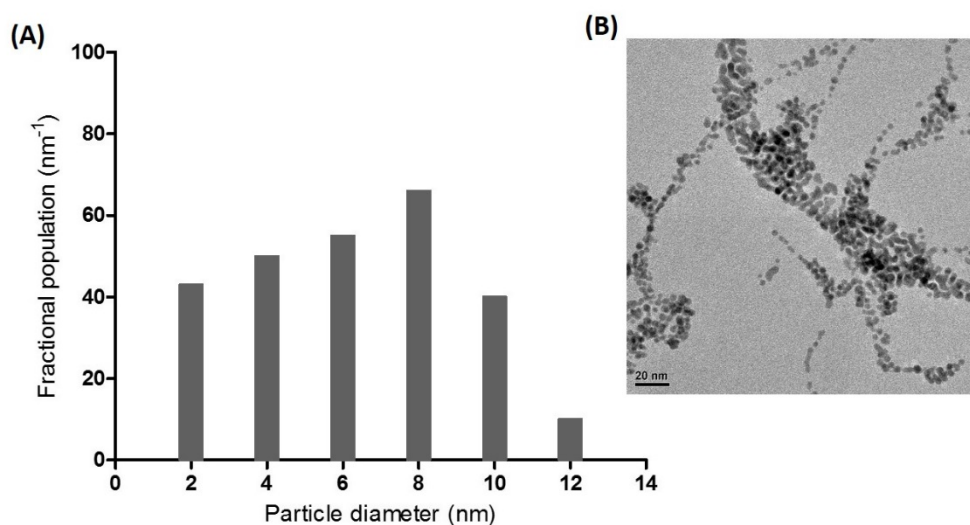

**Figure 1.** (A) Size distribution of Au-ZnTe core shell nanoparticles highlighting particles within the 2-10 nm range. The average size of the particles is 7 nm, SD  $\pm$  3.74 nm. (B) TEM micrograph of Au-ZnTe nanoparticles showing uniform, spherical morphology.

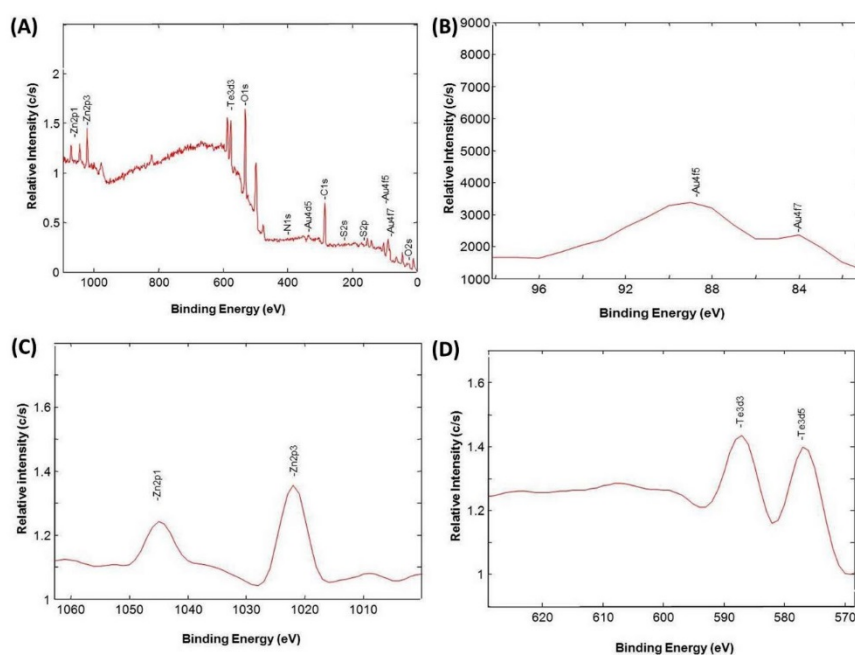

**Figure 2.** (A) XPS spectrum of Au-ZnTe core shell nanoparticles. (B) Binding energy spectrum of Au. (C) Binding energy spectrum of Zn. (D) Binding energy spectrum of Te.

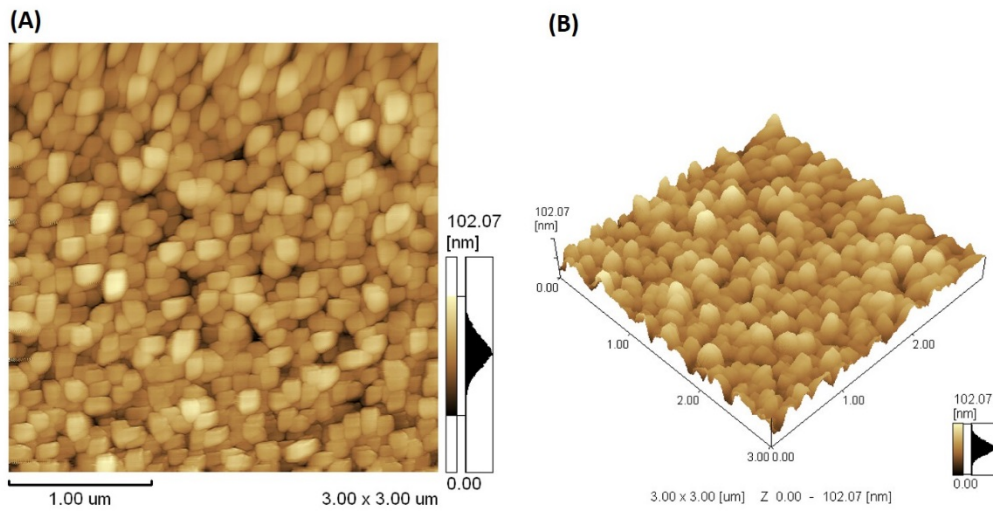

**Figure 3.** (A) Two dimensional image of Au-ZnTe core/shell nanoparticles showing uniform arrangement of nanoparticles (B) Three dimensional image of Au-ZnTe core/shell nanoparticles showing uniform surface height.
